# Supplementary material
Source: PubMed Central journal article supplement (PMC7295077)
Supplement: NIHMS1594628-supplement-Supplementary_information.pdf [file NIHMS1594628-supplement-Supplementary_information.pdf]

# Duplex DNA is Weakened in Nanoconfinement

Sagun Jonchhe, Shankar Pandey, Deepak Karna, Pravin Pokhrel, Yunxi Cui, Shubham Mishra,  
Hiroshi Sugiyama\*, Masayuki Endo\*, Hanbin Mao\*

## Supporting Information

### Table of Contents

|                                                                                                                                             |     |
|---------------------------------------------------------------------------------------------------------------------------------------------|-----|
| 1. Synthesis of the DNA origami nanocages that contain hairpin hosting DNA fragments. ....                                                  | S2  |
| 2. Synthesis strategy for the single-stranded DNA containing the bcl-2 hairpin forming sequence.<br>.....                                   | S9  |
| 3. Synthesis strategy for the single-stranded DNA that contains a telomeric G-quadruplex<br>sequence and a telomeric i-motif sequence. .... | S11 |
| 4. Characterization of the single molecular DNA nanocage construct by AFM. ....                                                             | S12 |
| 5. Unfolding/refolding force and change-in-contour-length measurements. ....                                                                | S13 |
| 6. Percentage populations of the hairpin and tetraplex structures. ....                                                                     | S17 |
| 7. Unfolding force versus extension plots. ....                                                                                             | S18 |
| 8. Expected change-in-contour-length ( $\Delta L$ ). ....                                                                                   | S20 |
| 9. Calculation of the change in free energy of unfolding ( $\Delta G_{\text{unfold}}$ ). ....                                               | S20 |
| 10. Estimation of the change in free energy of hairpin unfolding using mfold <sup>®</sup> . ....                                            | S22 |
| 11. Energy stored in the unfolding pathway of the bcl-2 hairpin. ....                                                                       | S23 |
| 12. Point spread function used to convert species populations to relative free energies. ....                                               | S23 |
| 13. Coarse-grained molecular dynamics (MD) simulation of bcl-2 hairpin inside the nanocages. ....                                           | S24 |
| 14. Quantitation of factors in the reduced stability of the duplex DNA. ....                                                                | S25 |
| 15. Supplemental references. ....                                                                                                           | S28 |

**1. Synthesis of the DNA origami nanocages that contain hairpin hosting DNA fragments.**

*Table S1. Plasmid, restriction enzyme, and primer strand for preparation of nanocages*

| Nanocages              | Plasmid, Restriction enzyme, Length | Complementary primer strands                                       |
|------------------------|-------------------------------------|--------------------------------------------------------------------|
| 15 × 15 nm<br>(7×7 HB) | p8064, PacI/ Bg1II,<br>3624 nts     | 5'- TAAGGGAAAATTAATTAATAGCGACGAT<br>5'- TAGCCTTTGTAGATCTCTCAAAAATA |

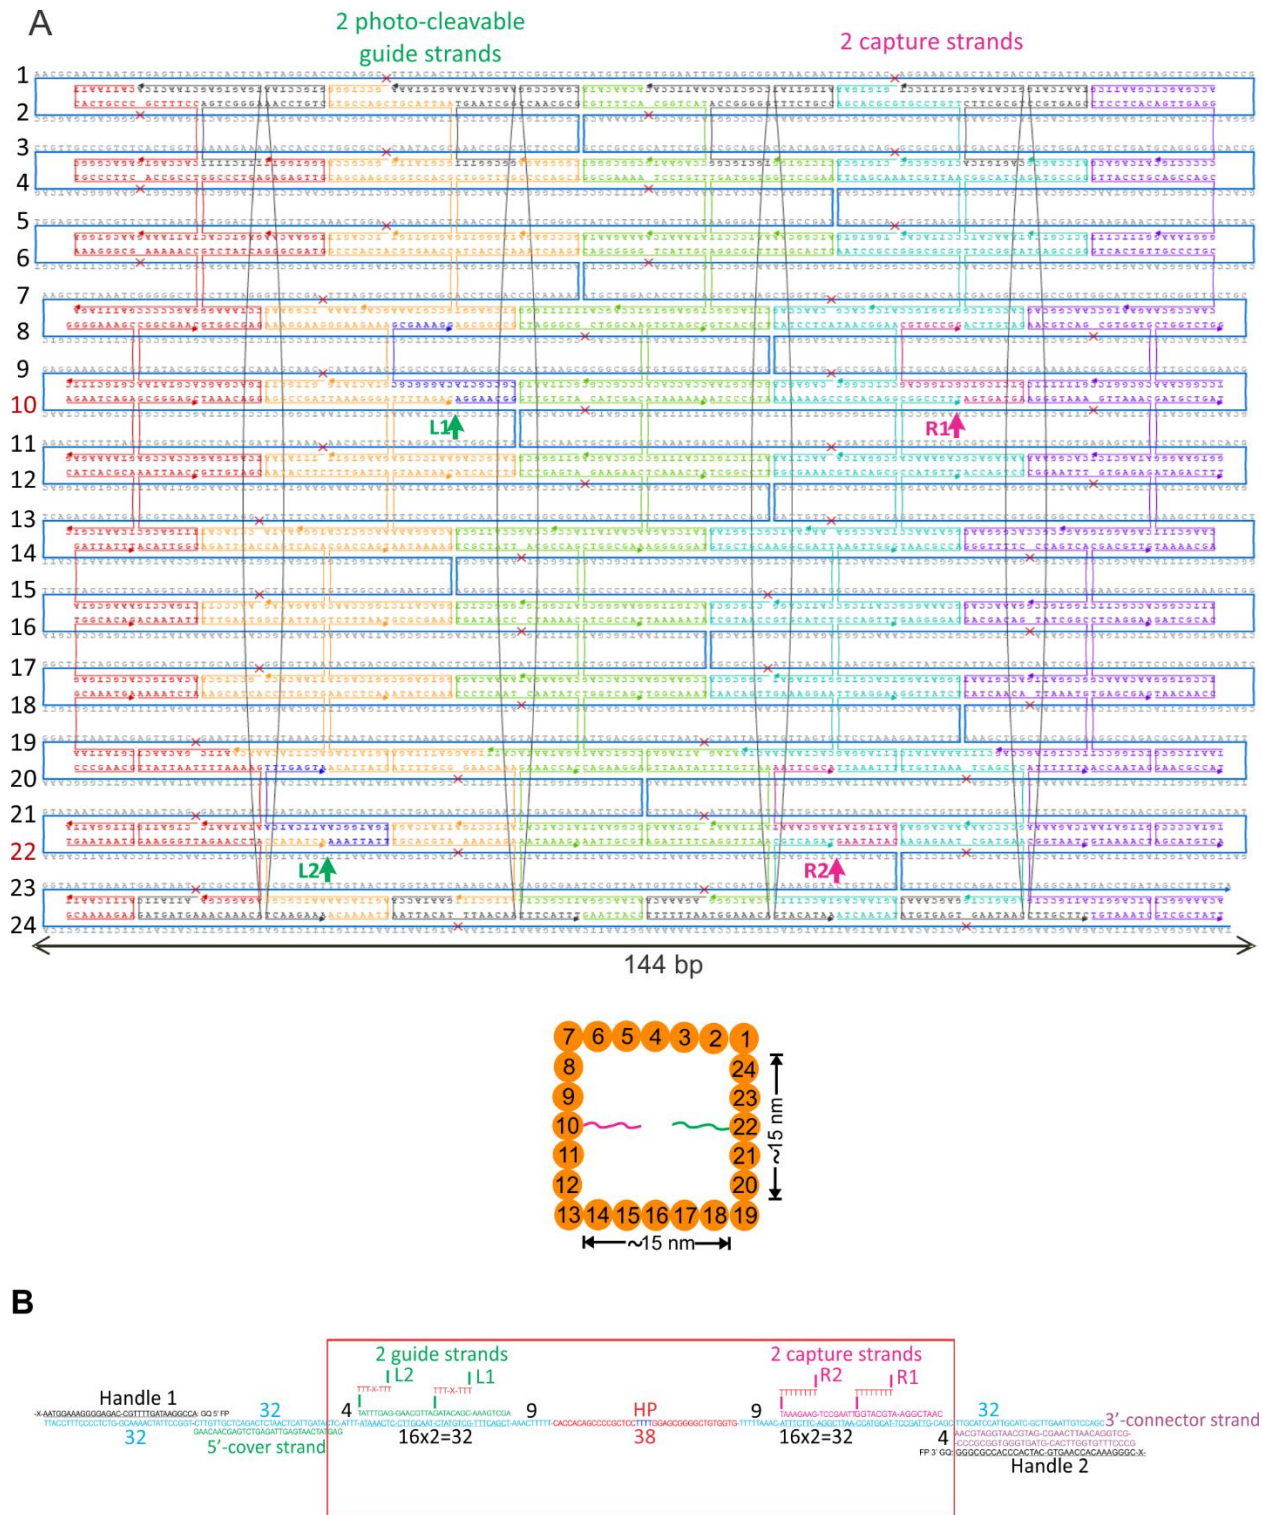

**Figure S1.** Design of the 15×15 nm (7×7 Helical Bundles, HB) nanocage. (A) *caDNAo* design of the 15×15 nm DNA origami nanocage that contains *bcl-2* hairpin forming strand. L1 and L2

represent the connection sites of the photo-cleavable guide strands while **R1** and **R2** represent the connection sites of the capture strands to link the hairpin hosting strand to the wall of the nanocage. A fragment of p8064 (3624 nts) was used as a template strand. Diagram shown at the bottom is the side view of the DNA nanocage. Each red cross mark is deletion of a base compared to previous design<sup>S1</sup> to adjust the pitch close to 10.5 bp/turn. (B) Detailed sequence of the 224-nt bcl-2 hairpin (HP) hosting strand. The tethering sites to the DNA nanocage (L1, L2, R1, R2) and the attachment sites to the dsDNA handles (Handle 1 and Handle 2) are depicted. Each number in (B) represents the length of a specific DNA fragment. The structure of photo-cleavable (X) is shown in Table S2.

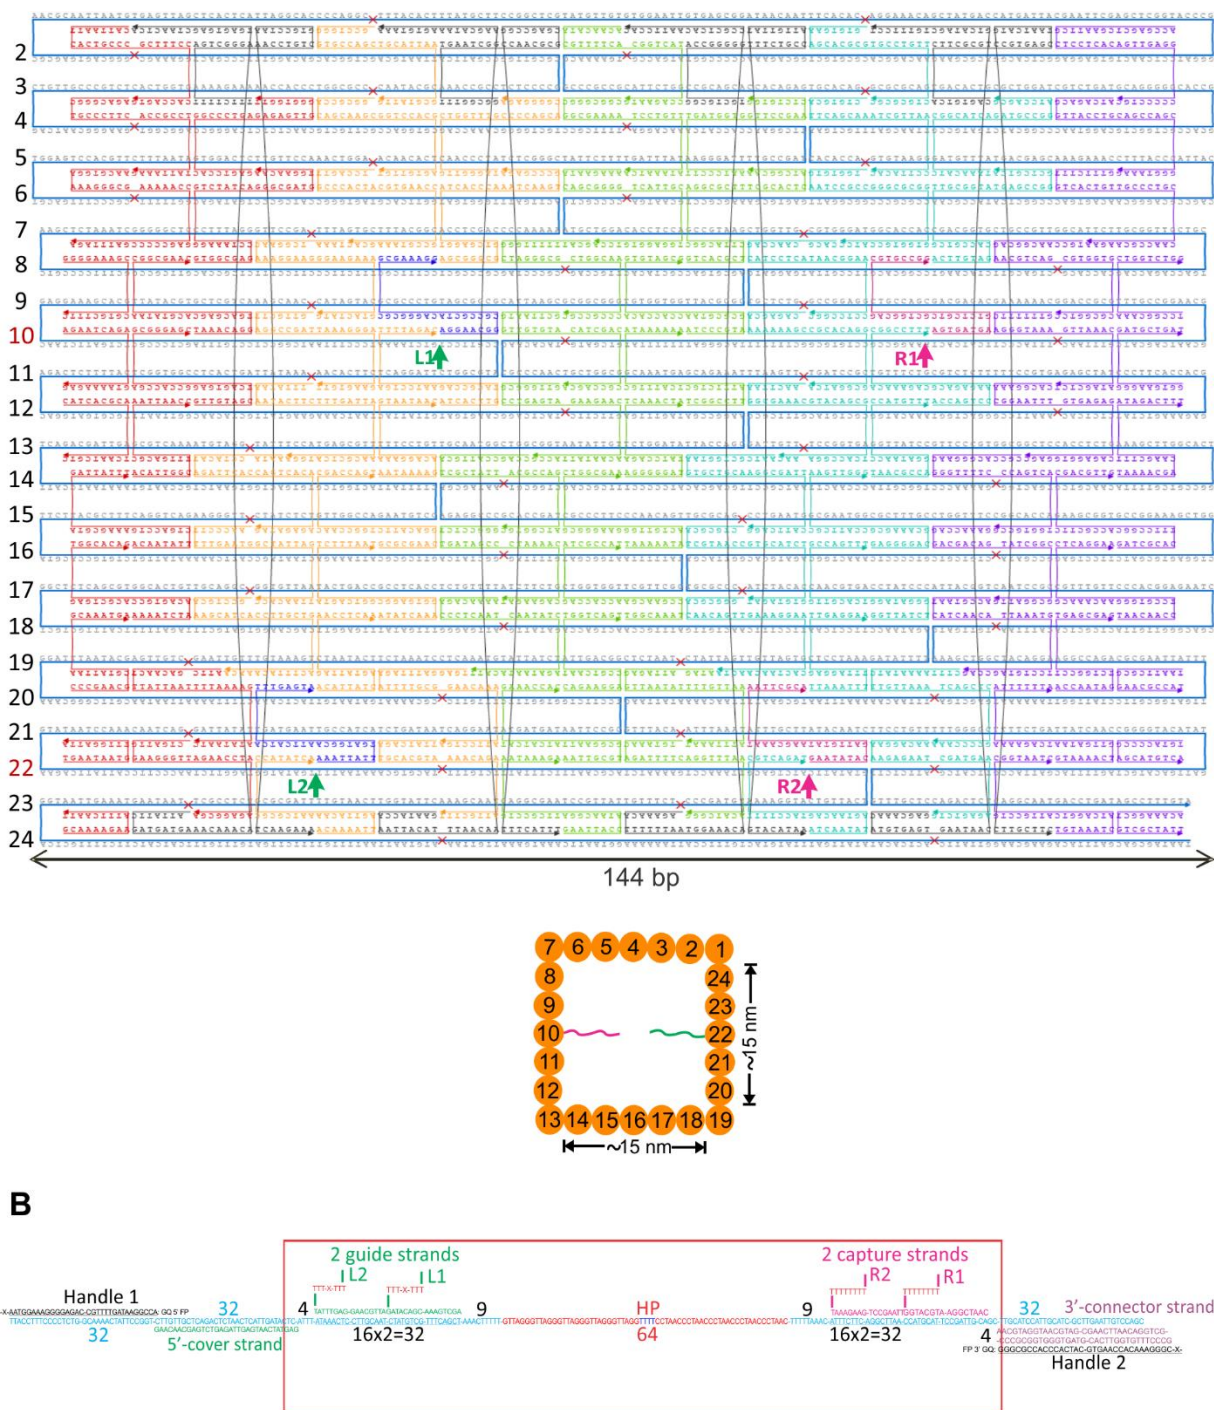

**Figure S2.** Design of the 15×15 nm (7×7 Helical Bundles, HB) nanocage. (A) caDNAo design of the 15×15 nm DNA origami nanocage that contains hairpin forming strand, with *i*-motif (*iM*) and *G*-quadruplex (*GQ*) forming sequences in complementary strands of the hairpin stem. **L1** and **L2** represent the connection sites of the photo-cleavable guide strands while **R1** and **R2** represent the connection sites of the capture strands to link the hairpin hosting strand to the wall of the

nanocage. A fragment of p8064 (3624 nts) was used as a template strand. Diagram shown at the bottom is the side view of the DNA nanocage. Each red cross mark is deletion of a base compared to previous design<sup>S1</sup> to adjust the pitch close to 10.5 bp/turn. (B) Detailed sequence of the 250-nt hairpin (HP) hosting strand. The tethering sites to the DNA nanocage (L1, L2, R1, R2) and the attachment sites to the dsDNA handles (Handle 1 and Handle 2) are depicted. Each number in (B) represents the length of a specific DNA fragment. The structure of photo-cleavable (X) is shown in Table S2.

**Table S2.** DNA staple sequences used to synthesize 15 nm × 15 nm DNA origami nanocage. Green and pink colored staple sequences containing 16-nt overhangs are used to hybridize with guide and capture strands, respectively. Underlined sequences in the guide and capture strands represent the respective staple sequences that hybridize with the overhangs mentioned above. The red “TTTTTTTT” and “TTTXTTT” sequences in the respective capture and guide strands represent the linkers between the nanocage and the HP strand, here ‘X’ in the guide strands depicts a photo-cleavable group,

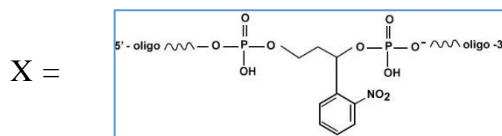

| Staple Name | Sequence                                  | Length |
|-------------|-------------------------------------------|--------|
| 7X7 NC 01   | CATTAATTCAGTCCCCGCTTTCCCACCAGTG           | 31     |
| 7X7 NC 02   | GCCTGGGGTGCCAGCTGCATTAAGCGTATTG           | 31     |
| 7X7 NC 03   | ACAACATACGTTTTTCACGGTCATCCAGAATG          | 31     |
| 7X7 NC 04   | GTGTGAAAGCACGCGTGCCTGTTCTGCGCGC           | 31     |
| 7X7 NC 05   | ACCGAGCTCGAATTCGCTCCTCACAGTTGAGGCCCCCTGC  | 40     |
| 7X7 NC 06   | AGACGGGCTGCCCTTACCAGCCTTATTAAG            | 31     |
| 7X7 NC 07 C | TTTCTTTTAGTCGGAAACCTGTCGTGCCTAATCAAGAAA   | 40     |
| 7X7 NC 08   | GGCGCCACAGCAAGCGGTCCACGAGTGTGT            | 31     |
| 7X7 NC 09 C | GGCGGTTTTGAATCGGCCAACGCGCGAGCCGGTTTTCATTT | 40     |
| 7X7 NC 10   | CGGCGGGCGCGAAAATCCTGTTATAAATCA            | 31     |
| 7X7 NC 11 C | TGCTGCGGACCGGGGTTTTCTGCCATTGTTATGTACATAA  | 40     |
| 7X7 NC 12   | CTGTGCATTCAGCAAATCGTTAACCTTACAC           | 31     |
| 7X7 NC 13 C | CAGTGTCACTTCGCGTCCGTGAGCTAATCATGCTTGCTTC  | 40     |
| 7X7 NC 14   | ATCAGACGGTTACCTGCAGCCAGCGGGTAAAG          | 32     |
| 7X7 NC 15   | AACGTGGAAAAGGGCGAAAACCGAGCCCCCGATTTAGA    | 39     |

|              |                                           |    |
|--------------|-------------------------------------------|----|
| 7X7 NC 16    | GAGTCCACGGCCCTGAGAGAGTTGGGGTGGTT          | 32 |
| 7X7 NC 17    | TCCAGTTGCCCACTACGTGAACCGCCGTAAGCAC        | 35 |
| 7X7 NC 18    | TAGGGTTGCTGGTTTTGCCCCAGCACGGGGAGA         | 32 |
| 7X7 NC 19    | AAAGAATACAGCGGGGTCATTGCTGGAGGTGTCCA       | 35 |
| 7X7 NC 20    | AATCCCTTTGATGGTGGTTCCGAACTCTGTGG          | 32 |
| 7X7 NC 21    | TGGTGTGAATCCGCCGGGCGCGGGTGGTGCCATCC       | 35 |
| 7X7 NC 22    | TAAACATCCGGCATCAGATGCCGGATCCAGCG          | 32 |
| 7X7 NC 23    | GTTTCTTTGTCACTGTTGCCCTGCCAACC GCAAGAA     | 36 |
| 7X7 NC 24    | TAAATCGGAACAAAGGAAGGGAAGAAAGTACTATG       | 35 |
| 7X7 NC 25    | GCATTTTTTGGGCTAGGGCGCTGGCAACCCGCCGC       | 35 |
| 7X7 NC 26    | CACGCAACCAGCATCCTCATAACGGAACCTCCGGC       | 35 |
| 7X7 NC 27    | TGCCAACGGCAGAACGTCAGCGTGGTGCGCGGTCC       | 35 |
| 7X7 NC 28    | GGGGAAAGCCGTGCTTTC                        | 18 |
| 7X7 NC 29    | GTGGCGAGCCTAAAGGGTCTATCAGGGCGATGTGGAACAA  | 40 |
| 7X7 NC 30    | AGCGGGCGGTCGAGGTATCACCCAAATCAAGTGCCCGAGA  | 40 |
| 7X7 NC 31    | GTCACGCTCTTACGGCAGGCGCTTTCGCACTCATCGGCAA  | 40 |
| 7X7 NC 32    | ACTTGTAGCACCGTTCGTTGCGGTATGAGCCGGGCTCGTCA | 40 |
| 7X7 NC 33    | GTTGCTTAGGCCGATTAAGGGAGAAGTGTT            | 31 |
| 7X7 NC 34    | GCTTAATGGTTGTGTACATCGACCGCCAGCA           | 31 |
| 7X7 NC 35    | CAGAGCAAAAAAAGCCGCACAGGGCGGATCA           | 31 |
| 7X7 NC 36    | GTTTTTTCAGGGTAAAGTTAAACATAGCTCT           | 31 |
| 7X7 NC 37    | TCCGGCAAACCTGGTCTGG                       | 18 |
| 7X7 NC 38    | AGAATCAGAGTAAAAGAG                        | 18 |
| 7X7 NC 39    | TAAACAGGTGACGAGCACGTATAACGGCGAAC          | 32 |
| 7X7 NC 40 L2 | AGGAACGGCGCCGCTACAGGGCGCGGAAAGG           | 32 |
| 7X7 NC 41    | ATCCCGTAGCGCGTAACCACCACAGTGTAGCG          | 32 |
| 7X7 NC 42 R2 | AGTGATGAGTCTCGTCGCTGGCAGCGTGCCGG          | 32 |
| 7X7 NC 43    | TTTATAAAATACTTCTTTGATTAAACGCTCATGGA       | 35 |
| 7X7 NC 44    | GTTGGGCGCCTGAGTAGAAGAACAATATTACCG         | 35 |
| 7X7 NC 45    | AACTTAAGGCGAAACGTACAGCGTCACCGGAAAC        | 34 |
| 7X7 NC 46    | CACGGAAACGGAATTTGTGAGAGCAGAGGTGGAGC       | 35 |
| 7X7 NC 47    | GGTGAAGGGGATGCTGAT                        | 18 |
| 7X7 NC 48    | CATCACGCATCAATCGTC                        | 18 |
| 7X7 NC 49    | GTTGTAGCTCAGTGAGGCCACCGAGCGGGAGC          | 32 |
| 7X7 NC 50    | ATCACTTGTACGCCAGAATCCTGATTTTAGAC          | 32 |
| 7X7 NC 51    | TCGGCCTTATTTCTGCTATTTGCATAAAAAA           | 32 |
| 7X7 NC 52    | ACCAGTCCAAGAGACGCAGAAACACGGCCTTT          | 32 |
| 7X7 NC 53    | AATACCTACATAGATTACCAGTCAAGAGATAG          | 35 |
| 7X7 NC 54    | CCAGCCATTGCATCGCTATTACGCCAGATCGGTGC       | 35 |
| 7X7 NC 55    | AATCGCTGGTAAGTGCTGCAAGGCGATTCATTCAGG      | 36 |
| 7X7 NC 56    | CGCCACGGGAACGGGTTTTCCAGTCATGGTGCCG        | 35 |
| 7X7 NC 57    | ACATTGGCTTTGACGCAATTAACC                  | 24 |
| 7X7 NC 58    | AATAAAAGACAGGAAAGTAATAAC                  | 24 |

|              |                                         |    |
|--------------|-----------------------------------------|----|
| 7X7 NC 59    | AGGGGGATTATCCAGATCAAACCTA               | 24 |
| 7X7 NC 60    | TAACGCCAGGATAACCCCATGTTT                | 24 |
| 7X7 NC 61    | TAAAACGACAAGCTTTATAGACTTT               | 25 |
| 7X7 NC 62    | AACCCTTTTTGAATGGCTATTAGTTAACACC         | 31 |
| 7X7 NC 63    | GGCCTCTTGATAGCCCTAAAACCAGAAGAT          | 31 |
| 7X7 NC 64    | CTGCGCATCGTAACCGTGCATCTGTGTAGAT         | 31 |
| 7X7 NC 65    | GAAACCAGGACGACAGTATCGGCGCGGATTG         | 31 |
| 7X7 NC 66    | ACAATATTCTGACCTGAAAGCGTAGATTATTT        | 32 |
| 7X7 NC 67    | GCGCGAACGGACATTCTGGCCAACCGACCAGT        | 32 |
| 7X7 NC 68    | TAAAAATAACTGTTGGGAAGGGCGCTGGCGAA        | 32 |
| 7X7 NC 69    | GAGGGGACGCAAAGCGCCATTCGCAAGTTGGG        | 32 |
| 7X7 NC 70    | GATCGCACTTTCCGGCACCGCTCCGACGTTG         | 32 |
| 7X7 NC 71    | GCCTGCAAAGCATCACCTTGCTGACTTTACAAACA     | 35 |
| 7X7 NC 72    | AAAACAGACCCTCAATCAATATCAGATAATACATT     | 35 |
| 7X7 NC 73    | GGGCGCACAACAGTTGAAAGGAACACTAACAACTA     | 35 |
| 7X7 NC 74    | ACCGTAATCATCAACATTAATGTCTGTAGCCAG       | 35 |
| 7X7 NC 75    | AAAATCTAACAGTGCCACGCTGAGTGGCACAG        | 32 |
| 7X7 NC 76    | ATATCAAAGGTGAGGCGGTCAGTATCTTTAAT        | 32 |
| 7X7 NC 77    | TGGCAAATCCGAACGAACCACCAGATCGCCAT        | 32 |
| 7X7 NC 78    | GGTTATCTGGGATAGGTCACGTTGGCCAGTTT        | 32 |
| 7X7 NC 79    | TAACAACCTCCGTGGGAACAAACGCTCAGGAA        | 32 |
| 7X7 NC 80    | ATTCGACAACCTTTATTAATTTTAAAAGATATAATC    | 35 |
| 7X7 NC 81    | TGAGGATTTAGAAATTTTGCGGAACAAAATTCCTGA    | 35 |
| 7X7 NC 82    | ATAGATTAGAGGTTAATATTTTGTAAATTTAAAT      | 35 |
| 7X7 NC 83    | CTTTAAAATATCTTGTTAAATCAGCTCGCCCCAAA     | 35 |
| 7X7 NC 84    | TAATTCGCGGAACGCCAT                      | 18 |
| 7X7 NC 85    | CCCGAACGCGTATTAAGCAAATGA                | 24 |
| 7X7 NC 86    | ACATTATCAGTATTAGAACCTCAA                | 24 |
| 7X7 NC 87    | CAGAAGGACCGTCAATTGGTCAGT                | 24 |
| 7X7 NC 88    | TTAAATTTTTTAGGAGTTGAGGAA                | 24 |
| 7X7 NC 89    | ACCAATAGTCTGGCCTTGAGCGAG                | 24 |
| 7X7 NC 90    | CTGATTGGAAGGGTTAGAACCTAAGAGGCGA         | 31 |
| 7X7 NC 91    | TTATCAGATGCACGTAACAGAAATTGCTTT          | 31 |
| 7X7 NC 92    | TGTAAACAGATTTTCAGGTTTAAACATCGGG         | 31 |
| 7X7 NC 93    | AACAGGAAAAGAGAATCGATGAAAGAGTCTG         | 31 |
| 7X7 NC 94    | TGTACCCCGAGCATGTCA                      | 18 |
| 7X7 NC 95    | TGAATAATGTTTGGATTA                      | 18 |
| 7X7 NC 96 L4 | AAATTATTTGATGGCAATTCATCATTTGAGTA        | 32 |
| 7X7 NC 97    | AATTGCGTGCGGAATTATCATCATGAAACCAC        | 32 |
| 7X7 NC 98 R4 | GAATATACGATTGTATAAGCAAATAATTCGCA        | 32 |
| 7X7 NC 99    | GTAAAACTGTTGATAATCAGAAAAATTTTTTA        | 32 |
| 7X7 NC 100 C | ATTATTCGATGATGAAACAAACATGAGTGAGCTAACTCA | 39 |
| 7X7 NC 101 C | GAATACCAAATTACATTTAACAAAAGCATAAAGTGAAA  | 39 |



|                   |                                                                |    |
|-------------------|----------------------------------------------------------------|----|
| 7X7 NC 102 C      | AGAAACATTTTTTAATGGAAACACCGCTCACAATTCCAC                        | 39 |
| 7X7 NC 103 C      | GAGCAAACATGTGAGTGAATAACGTCATAGCTGTTTCCT                        | 39 |
| 7X7 NC 104        | ACAAAGGCTGTCGCTATT                                             | 18 |
| 7X7 NC 105        | GCAAAGAAATTTCAATT                                              | 18 |
| 7X7 NC 106        | ACAAAATTAGTTACAAAATCGCGCCCATATCA                               | 32 |
| 7X7 NC 107        | GAATTACCATAACGGATTCGCCTGAATAAAGA                               | 32 |
| 7X7 NC 108        | ATCAATATAGTAACAGTACCTTTTCGTCAGAT                               | 32 |
| 7X7 NC 109        | TGTAATCATCAGGTCATTGCCTGCGGTAATC                                | 32 |
|                   |                                                                |    |
|                   | <b>2 photo-cleavable guide strands</b>                         |    |
| 7X7 NC 40 L2 16nt | AGCTGAAACGACATAC-TTTXTTT-<br>AGGAACGGCGCCGCTACAGGGCGCGGAAAGG   |    |
| 7X7 NC 96 L4 16nt | ATTGCAAGGAGTTTAT-TTTXTTT-<br>AAATTATTTGATGGCAATTCATCATTGAGTA   |    |
|                   | <b>2 capture strands</b>                                       |    |
| 7X7 NC 42 R2 16nt | CAATCGGAATGCATGG-TTTTTTTT-<br>AGTGATGAGTCTCGTCGCTGGCAGCGTGCCGG |    |
| 7X7 NC 98 R4 16nt | TTAAGCCTGAAGAAAT-TTTTTTTT-<br>GAATATACGATTGTATAAGCAAATAATTCGCA |    |

## 2. Synthesis strategy for the single-stranded DNA containing the bcl-2 hairpin forming sequence.

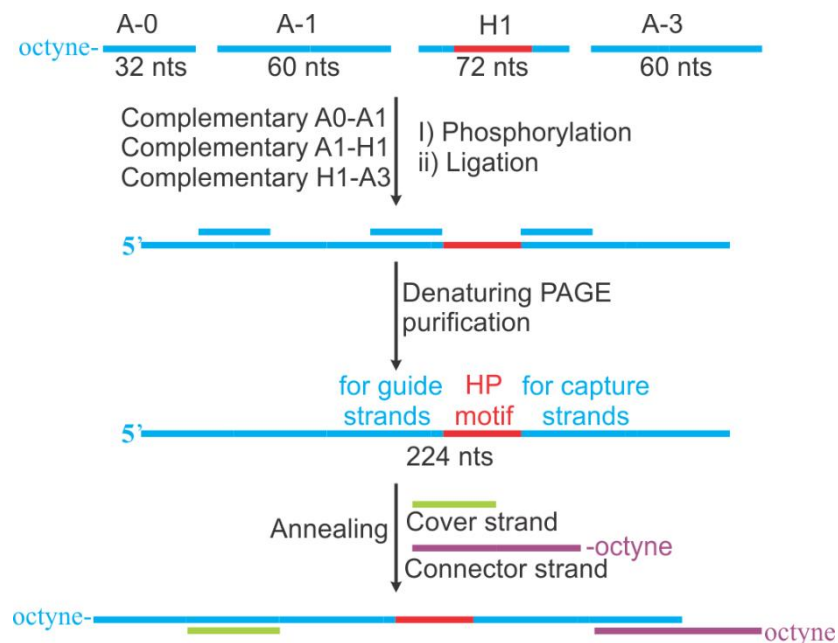

**Figure S3.** Flow chart for the synthesis of the 224-nt DNA fragment containing the bcl-2 hairpin sequence. This fragment passes through the DNA nanocage.

The following sequences of DNA oligos were used for the construct preparation.  
Respective sequences are listed below.

A0: 5'-TTA CCT TTC CCC TCT G-GC AAA ACT ATT CCG GT

A1: 5'-CTT GTT GCT CAG ACT C-TA ACT CAT TGA TAC TCA TTT ATA AAC TCC TTG CAA  
TGT ATG TCG

H1: 5'- TTT CAG CTA AAC TTT TTC ACC ACA GCC CCG CTC CTT TTG GAG CGG GGC TGT  
GGT GTT TTT AAA CAT TTC TTC

A3: 5'-AGG CTT AA-C CAT GCA TTC CGA TTG CAG CTT GCA TCC ATT GCA TCG CTT GAA  
TTG TCC AGC

Complementary A0-A1: 5'-CTG AGC AAC AAG –ACC GGA ATA GTT

Complementary A1-H1: 5'- GTTT-AGCTGAAA-CGACATAC-ATTG

Complementary H1-A3: 5'- ATGG-TTAAGCCT-GAAGAAAT-GTTT

5'-Cover strand: 5'- GAG TAT CAA TGA GTT AGA GTC TGA GCA ACA AG

3'-Connector strand: 5'- GCC CTT TGT GGT TCA C-GT AGT GGG TGG CGC CC-G CTG GAC AAT  
TCA AGC –GAT GCA ATG GAT GCA A

**3. Synthesis strategy for the single-stranded DNA that contains a telomeric G-quadruplex sequence and a telomeric i-motif sequence.**

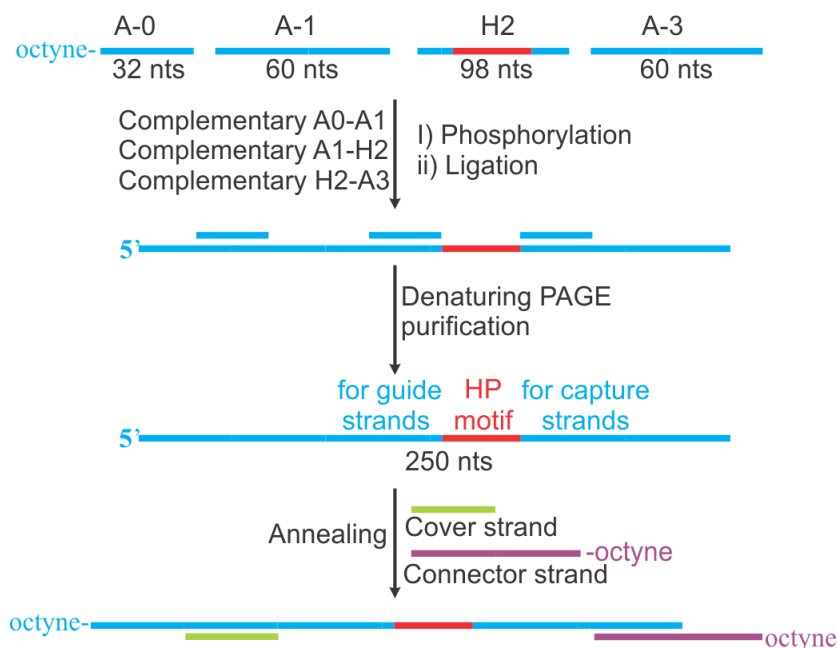

**Figure S4.** Flow chart for the synthesis of the 250-nt DNA fragment containing a hairpin forming sequence. A telomeric G-quadruplex sequence and a complementary i-motif sequence can form the stem of the hairpin (H2). This fragment passes through the DNA nanocage.

A0: 5'-TTA CCT TTC CCC TCT G-GC AAA ACT ATT CCG GT

A1: 5'-CTT GTT GCT CAG ACT C-TA ACT CAT TGA TAC TCA TTT ATA AAC TCC TTG CAA  
TGT ATG TCG

H2: 5'-TTT CAG CTA AAC TTT TTGT TAG GGT TAG GGT TAG GGT TAG GGT TAG GTT TTC  
CTA ACC CTA ACC CTA ACC CTA ACC CTA ACT TTT T AAA CAT TTC TTC

A3: 5'-AGG CTT AA-C CAT GCA TTC CGA TTG CAG CTT GCA TCC ATT GCA TCG CTT GAA  
TTG TCC AGC

Complementary A0-A1: 5'-CTG AGC AAC AAG -ACC GGA ATA GTT

Complementary A1-H2: 5'- GTTT-AGCTGAAA-CGACATAC-ATTG

Complementary H2-A3: 5'- ATGG-TTAAGCCT-GAAGAAAT-GTTT

5'-Cover strand: 5'- GAG TAT CAA TGA GTT AGA GTC TGA GCA ACA AG

3'-Connector strand: 5'- GCC CTT TGT GGT TCA C-GT AGT GGG TGG CGC CC-G CTG GAC AAT  
TCA AGC –GAT GCA ATG GAT GCA A

#### 4. Characterization of the single molecular DNA nanocage construct by AFM.

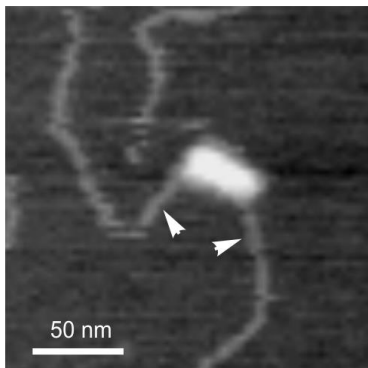

**Figure S5.** AFM image of a 15 nm × 15 nm DNA nanocage with the hairpin that contains tetraplex (G-quadruplex and i-motif) forming sequences in its complementary stem strands. The hairpin sequences are attached to dsDNA handles (arrowheads).

## 5. Unfolding/refolding force and change-in-contour-length measurements.

The unfolding of hairpin was marked by a sudden drop in force with a change in the extension of the tether which was recorded in F-X curves. The unfolding and refolding forces were measured from these F-X curves.

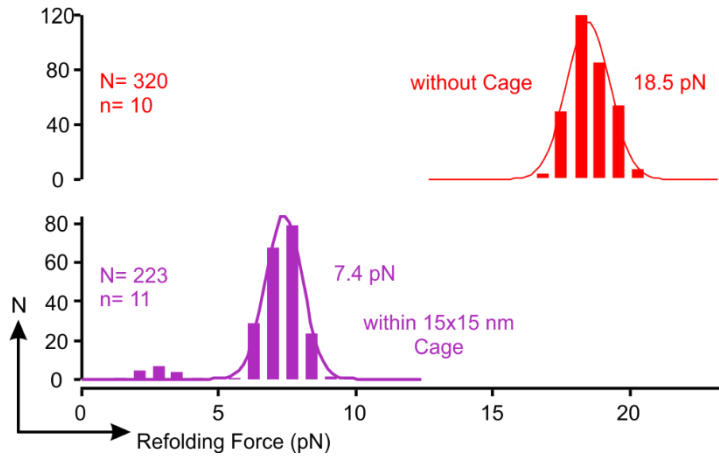

**Figure S6.** Refolding force histograms of the *bcl-2* hairpin without (red) and within the 15×15 nm nanocage (purple) in a 20 mM Tris buffer (pH 7.8) supplemented with 10 mM MgCl<sub>2</sub>, 1 mM EDTA, and 100 mM KCl at 25 °C. *N* and *n* represent the numbers of unfolding features and molecules, respectively. Refolding force was measured as the force at which the last refolding transition was observed during rapid unfolding and refolding transitions (see insets of Figure 2b&c).

Change-in-extension ( $\Delta x$ ) was obtained by measuring the extension change between the two data points flanking the unfolding and refolding events at the same force ( $F$ ). Change-in-contour-length ( $\Delta L$ ) was obtained from the  $\Delta x$  using modified worm-like chain model (Eqn S1).<sup>S2-3</sup>

$$\frac{\Delta x}{\Delta L} = 1 - \frac{1}{2} \left( \frac{k_b T}{FP} \right)^{1/2} + \frac{F}{S} \dots \dots \dots \text{Eqn S1}$$

where  $k_b$  is the Boltzmann constant,  $T$  is absolute temperature,  $P$  is the persistent length ( $50.9 \pm 1.6$  nm) and  $S$  is the stretching modulus ( $1168 \pm 119$  pN) of the duplex DNA handles.<sup>S4</sup>

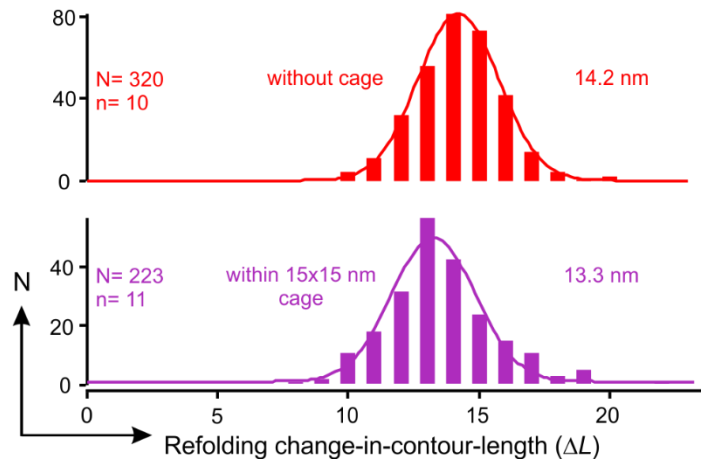

**Figure S7.** Refolding change-in-contour-length histogram of the *bcl-2* hairpin without (red) and within (purple) the  $15 \text{ nm} \times 15 \text{ nm}$  nanocage in a  $20 \text{ mM}$  Tris buffer ( $\text{pH} = 7.8$ ) supplemented with  $10 \text{ mM}$   $\text{MgCl}_2$ ,  $1 \text{ mM}$  EDTA, and  $100 \text{ mM}$  KCl at  $25 \text{ }^\circ\text{C}$ .  $N$  and  $n$  represent the numbers of unfolding features and molecules, respectively.

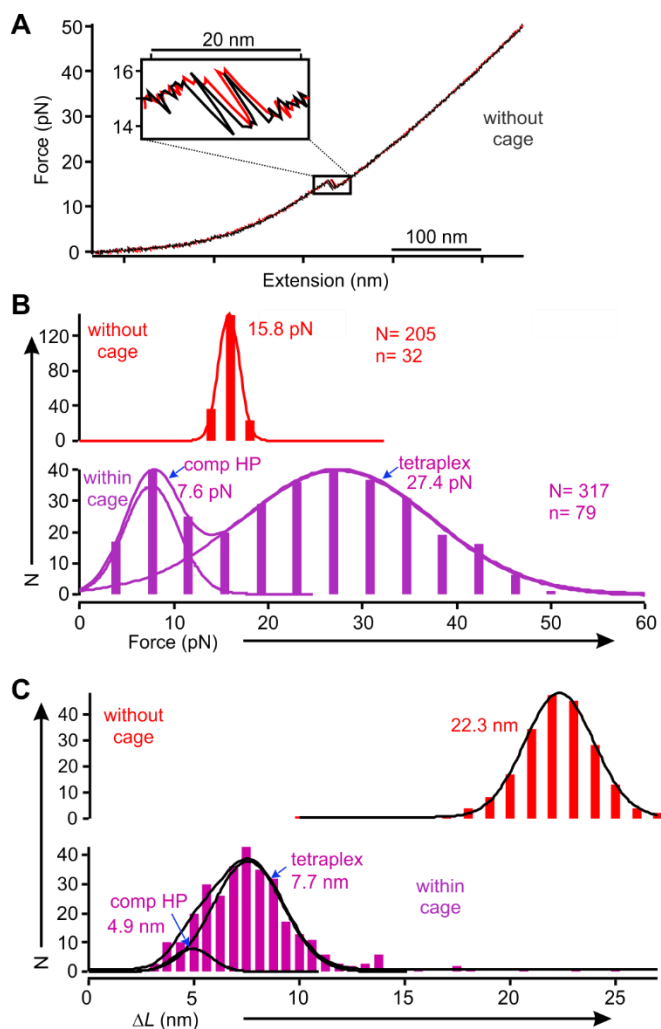

**Figure S8.** (A) A typical force versus extension curve of the DNA hairpin with telomeric G-quadruplex and i-motif forming sequences in the complementary stem strands without nanocage. Red and black represent stretching and relaxing traces, respectively. (B) Unfolding force histograms of the DNA hairpin outside (red) and inside the 15×15 nm nanocage (purple). Unfolding force was measured as the force at which the last unfolding transition was observed during rapid unfolding and refolding transitions (see inset of Figure S8 A). Populations of compromised hairpin structures (comp HP) and tetraplexes are indicated by arrows. Solid curves represent Gaussian fittings.  $N$  and  $n$  represent the numbers of unfolding features and molecules, respectively. (C) Change-in-contour-length ( $\Delta L$ ) histograms of the DNA hairpin outside (red) and inside (purple) the 15×15 nm nanocage. Populations of compromised hairpin structures (comp HP) and tetraplexes are indicated by arrows. Solid curves represent Gaussian fittings. A 10 mM

*MES (2-(N-morpholino)ethanesulfonic acid) buffer supplemented with 100 mM KCl, 10 mM MgCl<sub>2</sub>, and 1 mM EDTA (pH 5.5) was used in these experiments.*



## 6. Percentage populations of the hairpin and tetraplex structures.

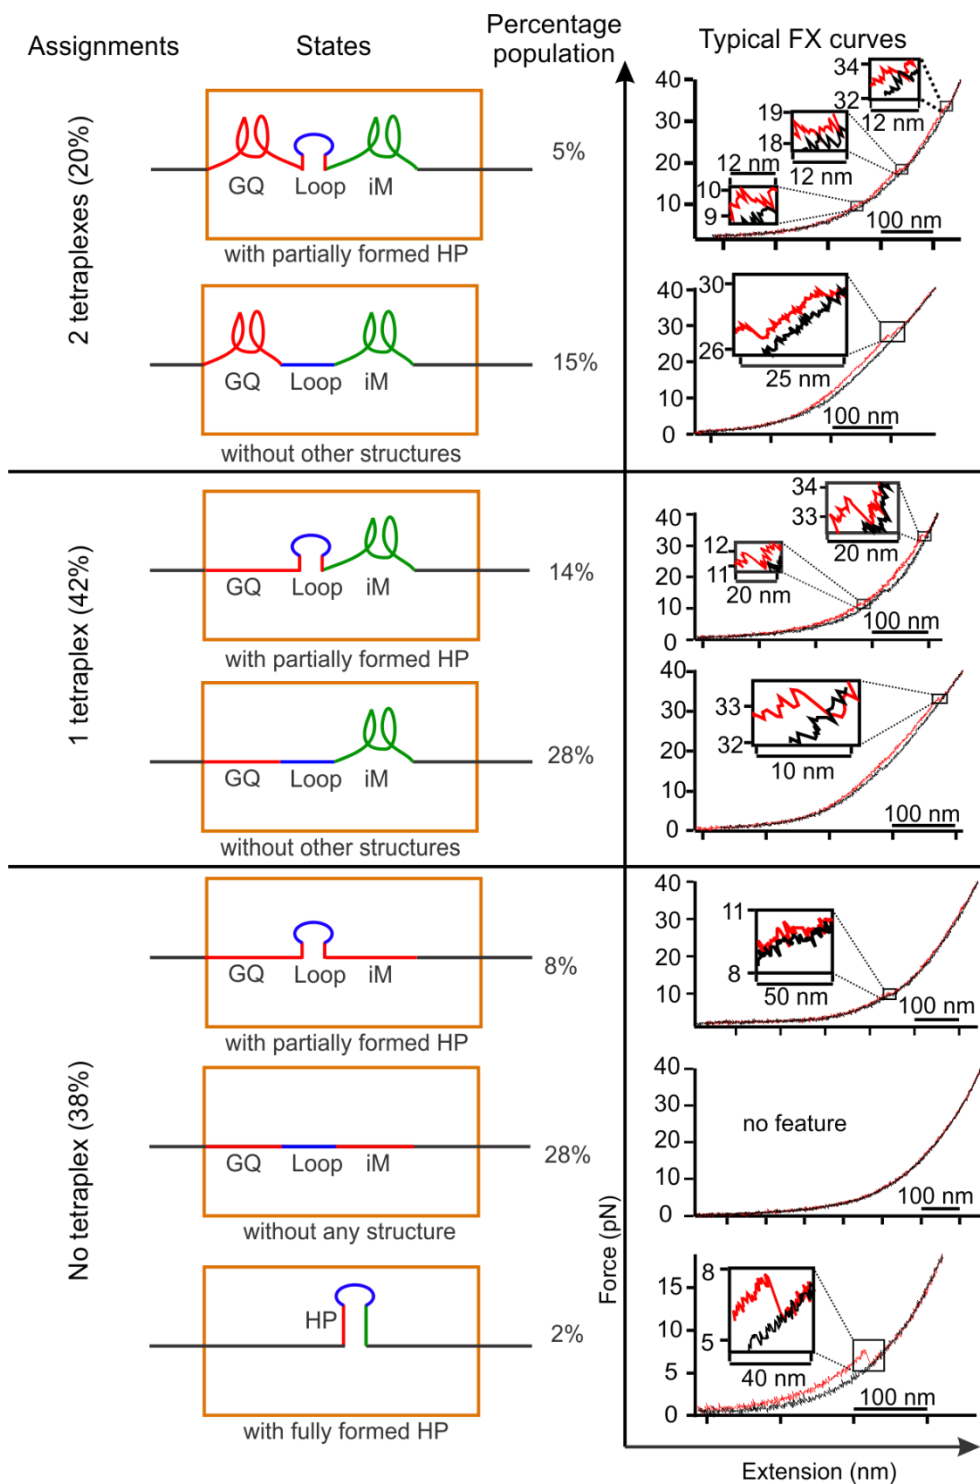

**Figure S9.** Percentage population of different species formed in the hairpin that contains the tetraplex forming sequences in its complementary stem strands. The associated typical force versus extension are shown to the right.

## 7. Unfolding force versus extension plots.

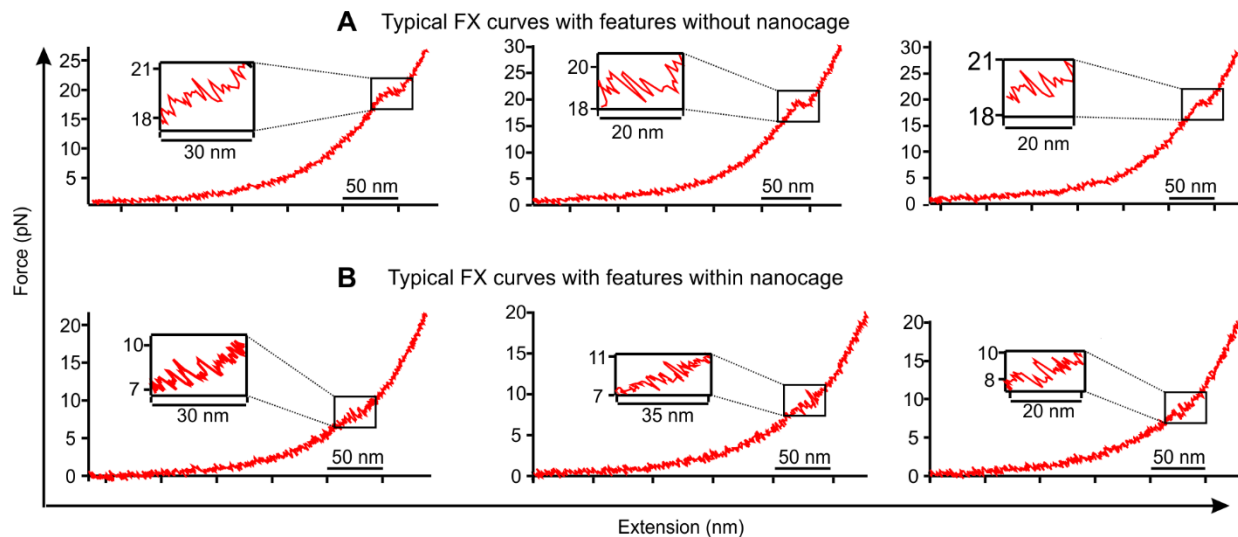

**Figure S10.** Typical unfolding force versus extension without A) and within B) the  $15 \times 15$  nm nanocage for *bcl-2* hairpin. The features in corresponding FX curves are expanded inside insets.

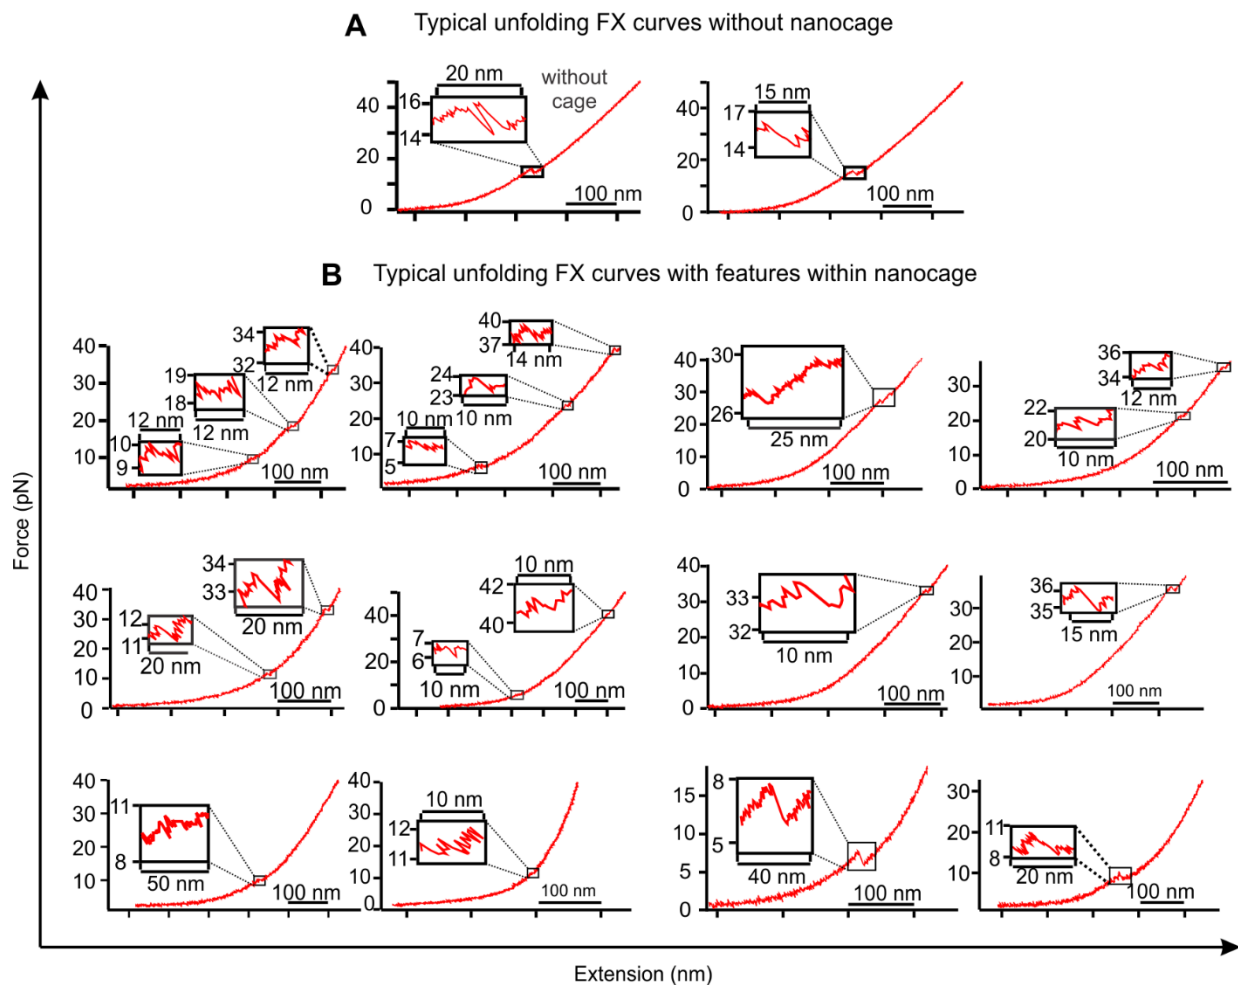

**Figure S11.** Typical unfolding force versus extension with transition features without A) and within B) the  $15 \times 15$  nm nanocage for the hairpin with tetraplex forming sequence in the stem. The features in corresponding FX curves are expanded inside insets.

**8. Expected change-in-contour-length ( $\Delta L$ ).**

The expected change-in-contour-length ( $\Delta L$ ) during the unfolding of the structure was calculated by the equation S2,

$$\Delta L = N \times L_{nt} - x \dots \dots \dots \text{(Eqn S2)}$$

where  $N$  is the number of nucleotides involved in the structure,  $L_{nt}$  is the contour length of each nucleotide (0.43 nm)<sup>S5-6</sup>, and  $x$  is the end-to-end distance of the hairpin structure (2 nm<sup>S7</sup>).

Thirty eight nucleotides (nts) (5'-CAC CAC AGC CCC GCT CCT TTT GGA GCG GGG CTG TGG TG) are involved in the formation of bcl-2 hairpin. Hence, the expected  $\Delta L$  for the unfolding of the bcl-2 hairpin is  $\Delta L = 38 \times 0.43 \text{ nm} - 2 \text{ nm} = 14.3 \text{ nm}$ .

Similarly, 64 nts (5'-GTT AGG GTT AGG GTT AGG GTT AGG GTT AGG TTT TCC TAA CCC TAA CCC TAA CCC TAA CCC TAA C) are involved in the formation of the hairpin that contains tetraplexes forming sequences in its stem. Hence, the expected  $\Delta L$  for the unfolding of the tetraplex containing hairpin is  $\Delta L = 64 \times 0.43 \text{ nm} - 2 \text{ nm} = 25.5 \text{ nm}$ .

**9. Calculation of the change in free energy of unfolding ( $\Delta G_{\text{unfold}}$ ).**

The change in free energy of unfolding was calculated from the corresponding works from unfolding events using Jarzynski's equality equation (Eqn S3).<sup>S8</sup>

$$\Delta G_{\text{unfold}} = -k_B T \ln \sum_{i=1}^N \frac{1}{N} \exp\left(-\frac{W_i}{k_B T}\right) \dots \dots \dots \text{(Eqn S3)}$$

where  $k_B$  is the Boltzmann constant,  $T$  is the absolute temperature,  $N$  is the number of repetitions of the experiments, and  $W$  is the non-equilibrium work done to unfold the bcl-2 hairpin. Work done was calculated using the equation,

$$W_i = \sum_{i=1}^N F_i \Delta x_i \dots \dots \dots \text{(Eqn S4)}$$

here  $F$  and  $\Delta x$  are the unfolding force and the change in extension due to mechanical unfolding of the structure, respectively.

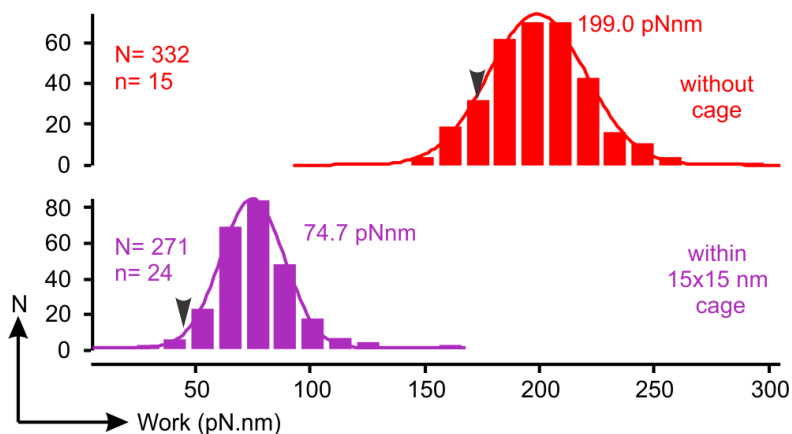

**Figure S12.** Unfolding work histograms of the *bcl-2* hairpin without (red) and within (purple) DNA nanocage in a 20 mM Tris buffer (pH 7.8) supplemented with 10 mM MgCl<sub>2</sub>, 1 mM EDTA, and 100 mM KCl at 25 °C. The arrowheads indicate the values of the change in the free energy of unfolding respective hairpins.  $N$  and  $n$  represent the numbers of unfolding features and molecules, respectively.

10. Estimation of the change in free energy of hairpin unfolding using mfold®.

Output of mfold\_graph (9)  
mfold\_util.e:7

Created Sat May 4 00:42:11 2019

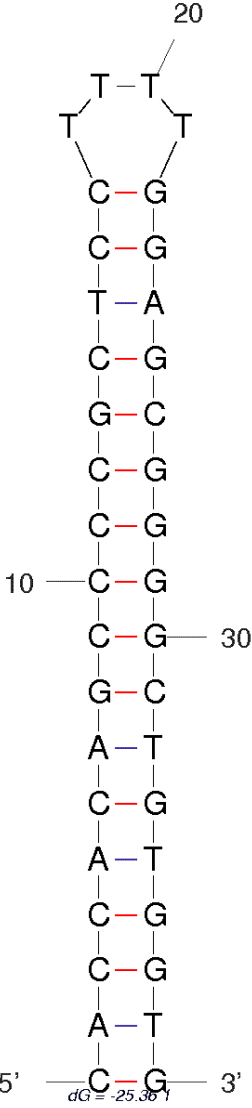

**Figure S13.** Bcl-2 hairpin structure generated from the mfold®.<sup>S9</sup> The change in free energy of unfolding was found to be -25.36 kcal in 100 mM Na<sup>+</sup> at 25 °C..

## 11. Energy stored in the unfolding pathway of the bcl-2 hairpin.

The free energy profile during the unfolding pathway ( $L$ ) of the bcl-2 hairpin at 0 force ( $G(L, F=0)_{\text{Hp}}$ ) can be obtained by correcting the free energy change at specific unfolding force ( $G(L, F)_{\text{Hp}}$ ) with the energies contributed by the optical trap energy ( $G(F)_{\text{trap}}$ ), extension of duplex DNA handles from  $0 \rightarrow F$  ( $G(F)_{\text{dsDNA}}$ ), extension of unfolded part of the hairpin from  $0 \rightarrow F$  ( $G(L, F)_{\text{unfold-Hp}}$ ), and extension of folded part of the hairpin from  $0 \rightarrow F$  ( $G(L, F)_{\text{fold-Hp}}$ ).<sup>S10</sup> The correction can be expressed in the equation (eqn S5) below.

$$G(L, F=0)_{\text{Hp}} = G(L, F)_{\text{Hp}} - G(F)_{\text{trap}} - G(F)_{\text{dsDNA}} - G(L, F)_{\text{unfold-Hp}} - G(L, F)_{\text{fold-Hp}} \dots \dots \dots (\text{Eqn S5})$$

## 12. Point spread function used to convert species populations to relative free energies.

Point Spread Function (PSF) was obtained from a control construct (construct without the hairpin forming sequence). PSF is defined as the Gaussian width of the change-in-contour-length histogram of the control construct at specific force range of interest (i.e., unfolding forces of the bcl-2 hairpins within and without nanocages). The obtained PSF value was used in the change-in-contour-length histogram of the bcl-2 hairpin construct. The PSF values at different force are shown in each histogram.

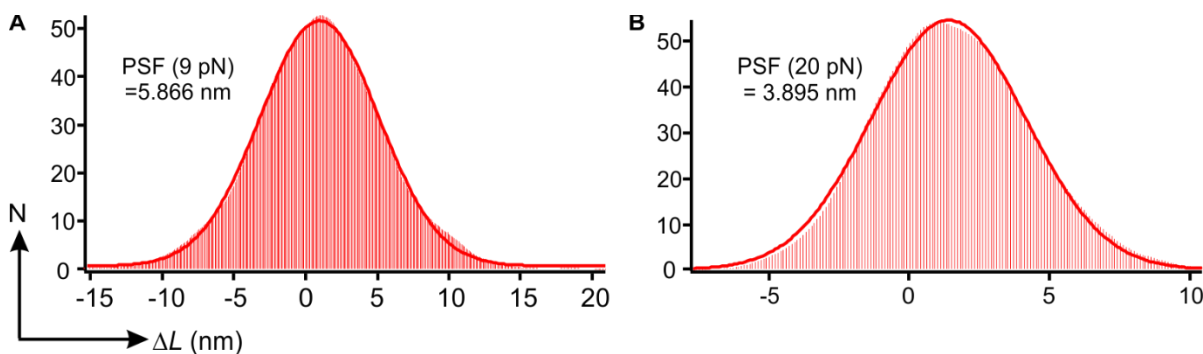

**Figure S14.** Change-in-contour-length ( $\Delta L$ ) histograms of the control construct (construct without hairpin forming sequence) at (A) 9 pN (PSF= 5.866 nm) and (B) 20 pN (PSF= 3.895 nm). The  $\Delta L$  was calculated from the change-in-extension between the stretching and relaxing force-extension curves at the same force. Notice there is no feature involved in this construct.

### 13. Coarse-grained molecular dynamics (MD) simulation of bcl-2 hairpin inside the nanocages.

The simulation was done at 277 K. We placed the folded bcl-2 DNA hairpin (previously simulated for 300  $\mu$ s) inside a 9 $\times$ 9 nm origami nanocage (obtained from Cadnano) in the oxDNA2 platform.<sup>S11</sup> The DNA hairpin contains a 25-nt ssDNA overhang on the guide strand end (Figure S1) and a 9-nt ssDNA with a 16-bp dsDNA on the other end that is connected to the origami nanocage. Energy minimization of the structure was performed for 30 ns. Finally, the coarse-grained molecular dynamic simulation was performed for 7.5  $\mu$ s at 277 K. Plot of the distance between the end of the ssDNA overhang of the hairpin and the opposite end of the nanocage versus simulation steps (Figure S15 C) shows a stable oscillating motion. Similarly, molecular simulations were performed for the folded bcl-2 DNA hairpin (Figure S15 D) and the folded DNA hairpin with tetraplex forming sequences in its complementary stem strands (Figure S15 E) inside the 15 $\times$ 15 nm origami nanocage.

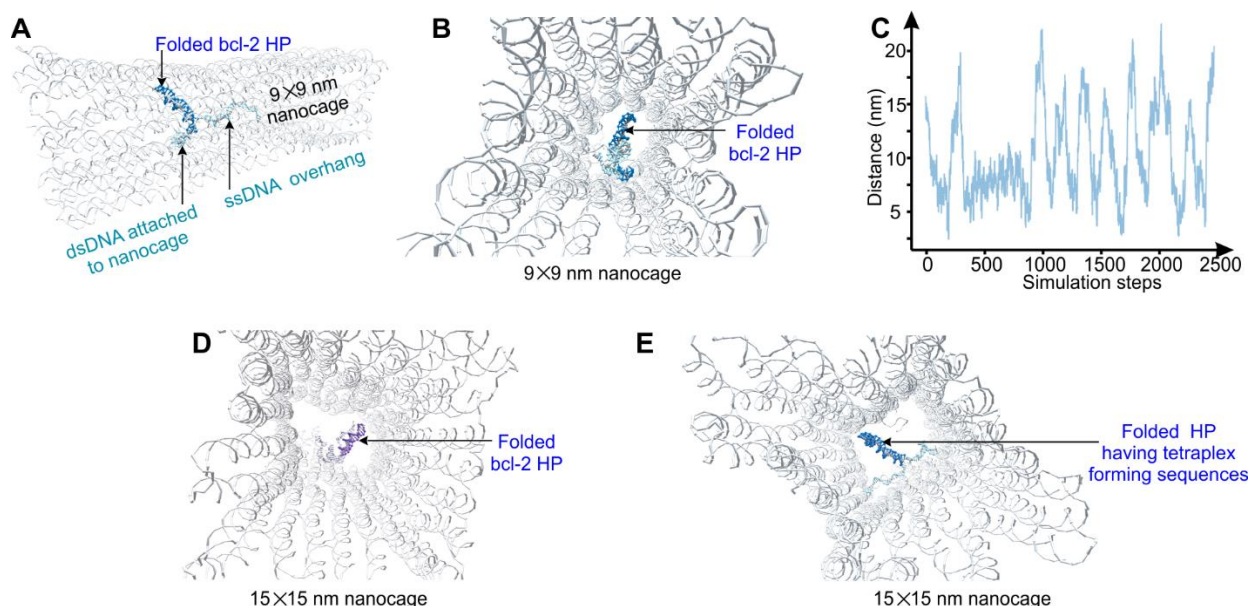

**Figure S15.** Representations of the coarse-grained MD simulation models of folded hairpins (blue) inside DNA origami nanocages (grey). A) Front view and B) side view of the folded bcl-2 hairpin (blue) inside the 9 $\times$ 9 nm DNA origami nanocage (grey). C) Plot of the distance between the end of the 25-nt ssDNA overhang attached to the bcl-2 hairpin and the opposite end of the nanocage versus simulation steps. This plot shows a stable oscillating pattern. D) A folded bcl-2



hairpin and E) a folded hairpin with tetraplex forming sequences in its complementary stem strands inside the  $15 \times 15$  nm DNA origami nanocage.

#### 14. Quantitation of factors in the reduced stability of the duplex DNA.

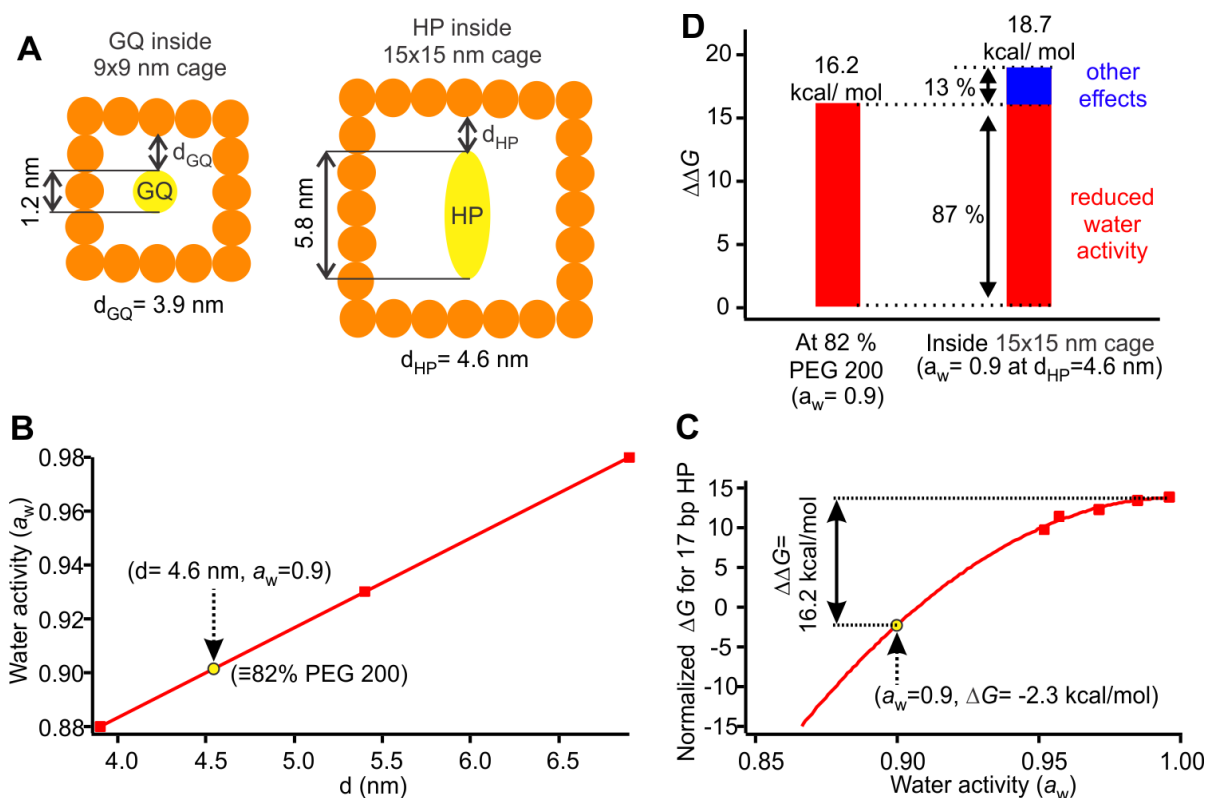

**Figure S16.** Quantitation of the effect of water activity on the stability of the *bcl-2* hairpin inside the nanocage. **A**) Schematic of the G-quadruplex (GQ) inside the  $9 \times 9$  nm nanocage (left) and the *bcl-2* hairpin (HP) inside the  $15 \times 15$  nm nanocage (right). “ $d$ ” indicates the closest distance between the DNA species (GQ or HP) and the DNA nanocage wall. **B**) Plot of water activity ( $a_w$ ) versus  $d$  (distance between the base of the stem of the *bcl-2* hairpin and the cage wall). Water activity of  $0.9$  was found by interpolation at  $d = 4.6$  nm. **C**) Plot of the normalized change in the unfolding free energy for a 17-bp hairpin versus water activity ( $a_w$ ). The plot is fitted with a three-term polynomial function which is extrapolated to find the change in the unfolding free energy at water activity ( $a_w$ ) of  $0.9$ . **D**) Comparative plots of the difference in the unfolding free energy change ( $\Delta\Delta G$ ) for a 17-bp hairpin in 82% equivalent PEG 200 and that inside the  $15 \times 15$  nm

nanocage.  $\Delta\Delta G$  here is calculated against the free energy change of unfolding the 17-bp hairpin at water activity  $a_w=1$ .

Water activity inside the nanocage is a function of the distance from the nanocage wall. Inside the nanocage, the water activity in the middle of the nanocage is the highest while the vicinity of the nanocage wall has the lowest water activity due to increased ion-dipole interactions. The water activity ( $a_w$ ) at the center of the 15×15 nm nanocage was reported to be 0.98 which was measured based on the G-quadruplex (GQ) inside the nanocage.<sup>S4</sup> The GQ has a spherical shape with a diameter of ~1.2 nm and is confined at the center of the nanocage (Figure S16 A, left). On the other hand, molecular simulation of 17-bp (base pair) bcl-2 hairpin inside the 9×9 nm nanocage revealed that the hairpin is pointed towards the wall of the nanocage (Figure S15 A&B) which has the lowest water activity compared to the water activity at the center of the nanocage. The bcl-2 hairpin has an elongated shape with the height of ~5.8 nm ( $0.34 \text{ nm/bp} \times 17 \text{ bp} = 5.8 \text{ nm}$ , see Figure S16 A, right). Using the Eqn S6 shown below, we found that the distance between the base of the stem of the bcl-2 hairpin and the wall of the 15×15 nm nanocage is 4.6 nm, which is closest to the distance between the edge of the GQ and the wall of the 9×9 nm nanocage (3.9 nm) (Table S3).

$$d = \frac{(\text{cage height} - \text{molecule height})}{2} \dots\dots\dots \text{(Eqn S6)}$$

where “ $d$ ” is the closest distance between the edge of the DNA species (GQ or hairpin) and the wall of a nanocage.

Therefore, the water activity experienced by the bcl-2 hairpin inside the 15×15 nm nanocage will be close to the water activity experienced by the GQ inside the 9×9 nm nanocage. It should be noted that the water activity at the base of the stem of the hairpin is critical since the mechanical unfolding starts from the base of the stem of the hairpin. Using the plot of water activity versus distance between the hairpin and the nanocage, the water activity at 4.6 nm away from the nanocage has been interpolated to be 0.90 (see Figure S16 B). The interpolated water activity ( $a_w= 0.90$ ) is equivalent to 82% of PEG 200 (Figure S16 B).



## 15. Supplemental references.

- S1. Shrestha, P.; Jonchhe, S.; Emura, T.; Hidaka, K.; Endo, M.; Sugiyama, H.; Mao, H., Confined space facilitates G-quadruplex formation. *Nat. Nanotechnol.* **2017**, *12* (6), 582-588.
- S2. Yu, Z.; Mao, H., Non-B DNA structures show diverse conformations and complex transition kinetics comparable to RNA or proteins — a perspective from mechanical unfolding and refolding experiments. *Chem. Rec.* **2013**, *13*, 102-116.
- S3. Baumann, C. G.; Smith, S. B.; Bloomfield, V. A.; Bustamante, C., Ionic effects on the elasticity of single DNA molecules. *Proc. Natl. Acad. Sci. USA.* **1997**, *94*, 6185-6190.
- S4. Jonchhe, S.; Pandey, S.; Emura, T.; Hidaka, K.; Hossain, M. A.; Shrestha, P.; Sugiyama, H.; Endo, M.; Mao, H., Decreased water activity in nanoconfinement contributes to the folding of G-quadruplex and i-motif structures. *Proc. Natl. Acad. Sci. U S A* **2018**, *115* (38), 9539-9544.
- S5. Mills, J. B.; Vacano, E.; Hagerman, P. J., Flexibility of single-stranded DNA: use of gapped duplex helices to determine the persistence lengths of poly(dT) and poly(dA). *J. Mol. Biol.* **1999**, *285*, 245-257.
- S6. Record, M. T. J.; Anderson, C. F.; Lohman, T. M., Thermodynamic analysis of ion effects on the binding and conformational equilibria of proteins and nucleic acids: the roles of ion association or release, screening, and ion effects on water activity. *Quart. Rev. Biophys.* **1978**, *11*, 103-178.
- S7. Shlyakhtenko, L. S.; Potaman, V. N.; Sinden, R. R.; Lyubchenko, Y. L., Structure and dynamics of supercoil-stabilized DNA cruciforms. *J Mol Biol* **1998**, *280*, 61- 72.
- S8. Jarzynski, C., Nonequilibrium Equality for Free Energy Differences. *Phys. Rev. Lett.* **1997**, *78*, 2690 - 2693.
- S9. Zuker, M., Mfold web server for nucleic acid folding and hybridization prediction. *Nucleic Acids Res.* **2003**, *31*, 3406–3415.

- S10. Koirala, D.; Punnoose, J. A.; Shrestha, P.; Mao, H., Yoctoliter thermometry for single-molecule investigations: A generic bead-on-a-tip temperature-control module. *Angew. Chem. Int. Ed. Engl.* **2014**, *53* (13), 3470-3474.
- S11. Doye, J. P. K.; Ouldrige, T. E.; Louis, A. A.; Romano, F.; Šulc, P.; Matek, C.; Snodin, B. E. K.; Rovigatti, L.; Schreck, J. S.; Harrison, R. M.; Smith, W. P. J., Coarse-graining DNA for simulations of DNA nanotechnology. *Physical Chemistry Chemical Physics* **2013**, *15* (47), 20395-20414.
- S12. Miyoshi, D.; Karimata, H.; Sugimoto, N., Hydration Regulates Thermodynamics of G-Quadruplex Formation under Molecular Crowding Conditions. *J. Am. Chem. Soc.* **2006**, *128* (24), 7957-7963.
